# Supplementary material
Source: publisher figshare collection journal article supplement (https://acs.figshare.com/ndownloader/files/26014155)
Supplement: Supplementary file 1 [file 26014155]

# The Development of Hsp90 $\beta$ -selective Inhibitors to Overcome Detriments

## Associated with *pan*-Hsp90 Inhibition

*Sanket J. Mishra,<sup>1</sup> Weiya Liu,<sup>2</sup> Kristin Beebe,<sup>3</sup> Monimoy Banerjee,<sup>1</sup> Caitlin N. Kent,<sup>1</sup> Vitumbiko Munthali,<sup>1</sup> John Koren III,<sup>1</sup> John A Taylor III,<sup>2</sup> Leonard M. Neckers,<sup>3</sup> Jeffrey Holzbeierlein,<sup>2</sup> and Brian S. J. Blagg<sup>\*1</sup>*

<sup>1</sup> Department of Chemistry and Biochemistry, The University of Notre Dame, 305 McCourtney Hall, Notre Dame, IN, 46556, USA

<sup>2</sup> Department of Urologic Oncology, University of Kansas Medical Center, 3901 Rainbow Boulevard, Kansas City, KS, 66160, USA

<sup>3</sup> Center for Cancer Research, National Cancer Institute, Building 10 - Hatfield CRC, Rockville, MD, 20892, USA

### Contents

|                                       |   |
|---------------------------------------|---|
| Table S1: GI50 values of 6a .....     | 2 |
| HPLC analysis.....                    | 3 |
| Figure S2: NCI-60 4d (one-dose) ..... | 5 |

|                                                                        |    |
|------------------------------------------------------------------------|----|
| Figure S3: NCI-60 4d (five-dose) .....                                 | 6  |
| Figure S4: NCI-60 17-AAG (five-dose).....                              | 7  |
| Figure S5: NCI-60 6a (one-dose) .....                                  | 8  |
| Table S1: IC <sub>50</sub> in Grp94 and Trap1 .....                    | 9  |
| Table S2: GI <sub>50</sub> values against Hct116 and Hek293 cells..... | 10 |

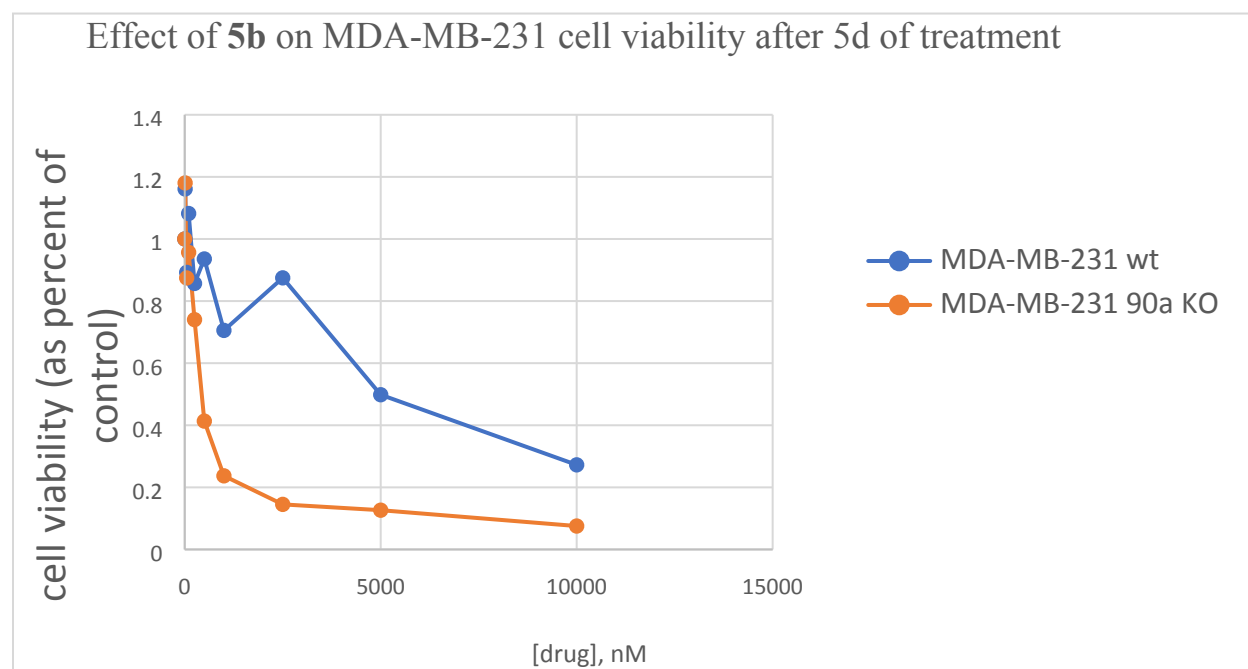

**Figure S1:** Effect of **5b** on Growth Inhibition Wild type and Hsp90 $\alpha$  knockout MDA-MB-231 cells MDA-MB-231 cells (wild-type or Hsp90 $\alpha$  KO) were plated (5000/well) and treated the next day with indicated concentrations of KUNB106. Cell viability was assayed after 5 days of drug

treatment via CellTiter-Glo, which measures ATP via luminescence. Cell viability is represented here as a percent of untreated cells.

## HPLC Analysis

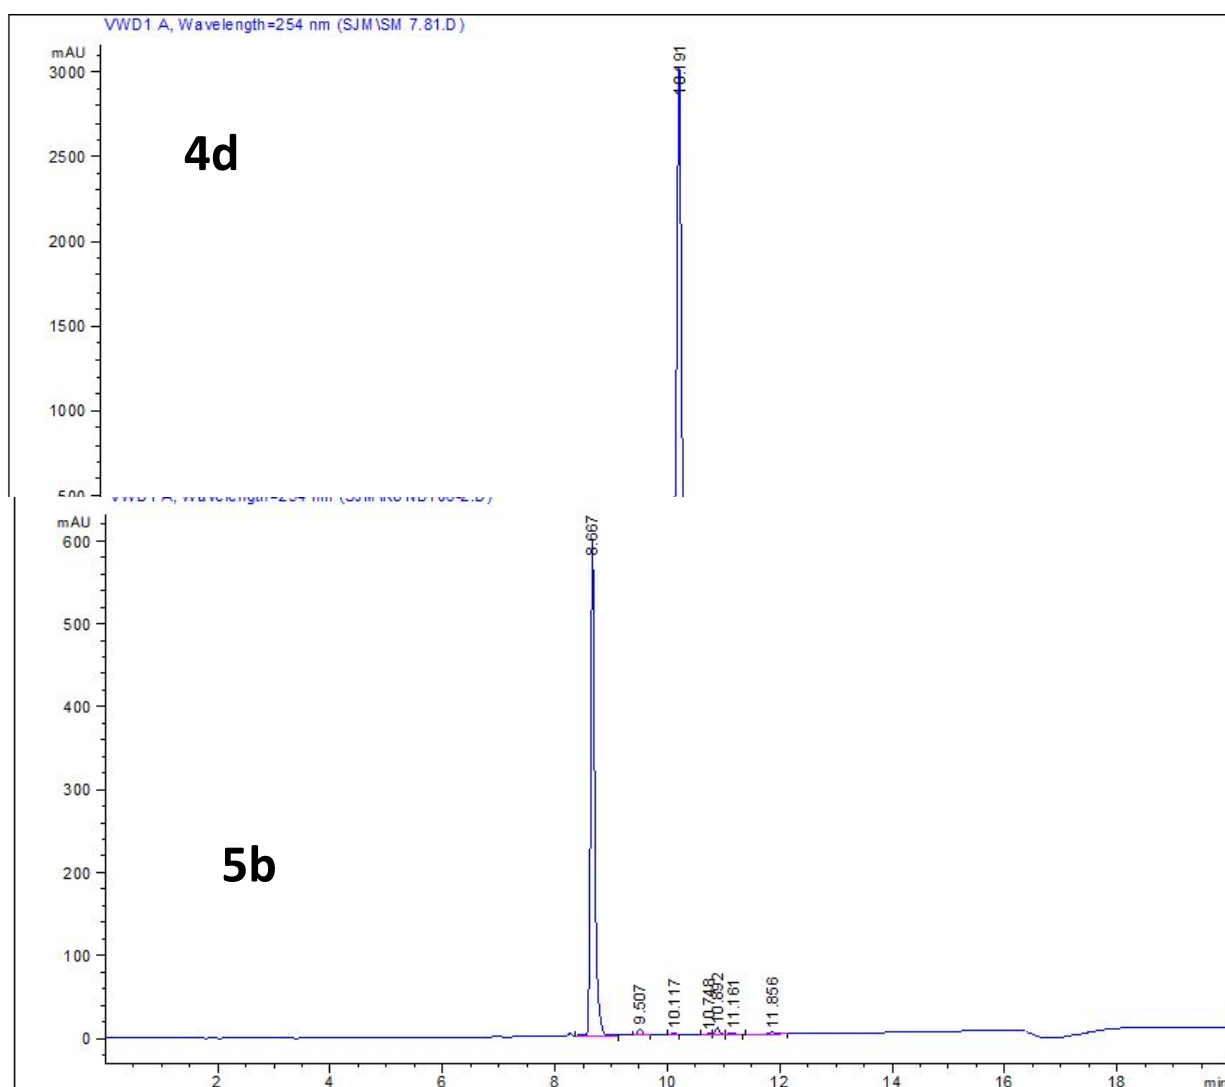

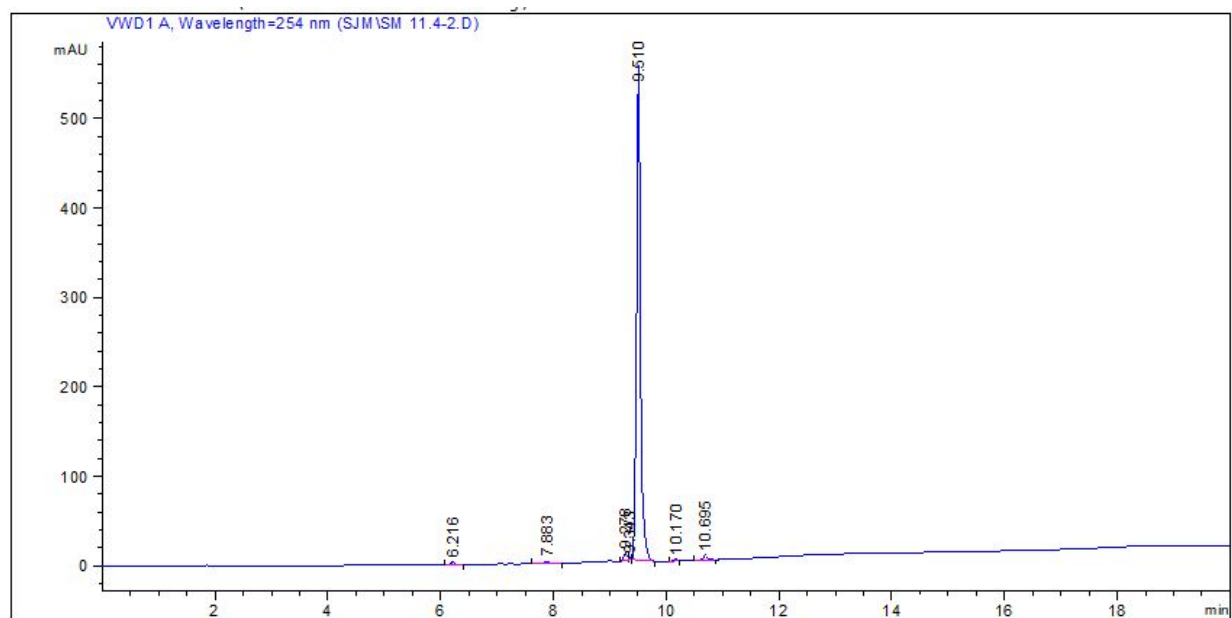

**6a**

**Figure S2:** NCI-60 Cell screening results with of **4d** (one-dose experiment)

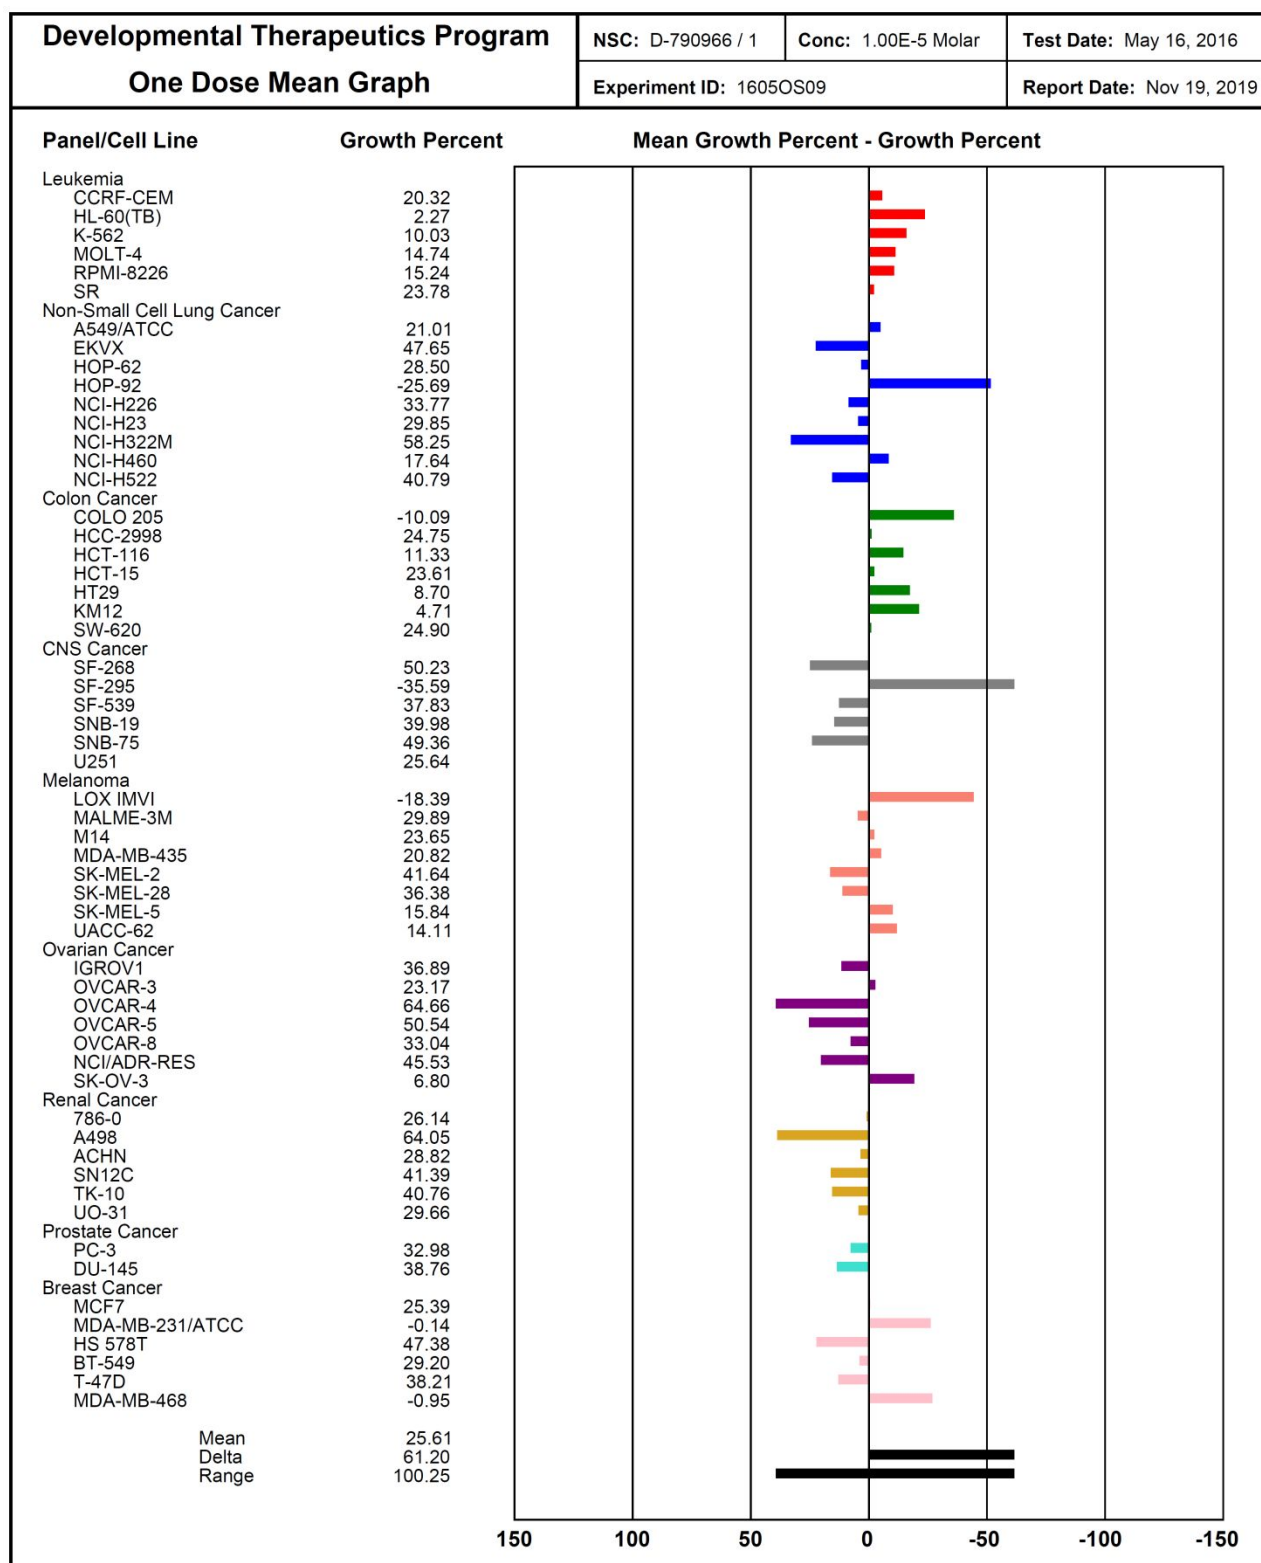

**Figure S3:** NCI-60 Cell screening results with GI50 values of **4d** (five-dose experiment)

# National Cancer Institute Developmental Therapeutics Program In-Vitro Testing Results

| NSC : D - 790966 / 1            |           |       | Experiment ID : 1606NS35              |       |       |       |       |                |      |      |      |      | Test Type : 08 |           | Units : Molar |  |
|---------------------------------|-----------|-------|---------------------------------------|-------|-------|-------|-------|----------------|------|------|------|------|----------------|-----------|---------------|--|
| Report Date : November 19, 2019 |           |       | Test Date : June 27, 2016             |       |       |       |       |                |      |      |      |      | QNS :          |           | MC :          |  |
| COMI : KUNB105                  |           |       | Stain Reagent : SRB Dual-Pass Related |       |       |       |       |                |      |      |      |      | SSPL : 0XWC    |           |               |  |
| Panel/Cell Line                 | Time Zero | Ctrl  | Log10 Concentration                   |       |       |       |       |                |      |      |      |      | GI50           | TGI       | LC50          |  |
|                                 |           |       | Mean Optical Densities                |       |       |       |       | Percent Growth |      |      |      |      |                |           |               |  |
|                                 |           |       | -8.0                                  | -7.0  | -6.0  | -5.0  | -4.0  | -8.0           | -7.0 | -6.0 | -5.0 | -4.0 |                |           |               |  |
| Leukemia                        |           |       |                                       |       |       |       |       |                |      |      |      |      |                |           |               |  |
| CCRF-CEM                        | 0.461     | 2.251 | 2.212                                 | 1.517 | 0.775 | 0.609 | 0.658 | 98             | 59   | 18   | 8    | 11   | 1.65E-7        | > 1.00E-4 | > 1.00E-4     |  |
| HL-60(TB)                       | 1.083     | 3.315 | 3.302                                 | 2.009 | 1.061 | 0.796 | 0.661 | 99             | 41   | -2   | -27  | -39  | 7.13E-8        | 8.98E-7   | > 1.00E-4     |  |
| K-562                           | 0.291     | 2.175 | 2.085                                 | 0.669 | 0.549 | 0.429 | 0.446 | 95             | 20   | 14   | 7    | 8    | 4.00E-8        | > 1.00E-4 | > 1.00E-4     |  |
| MOLT-4                          | 0.724     | 2.800 | 2.684                                 | 1.713 | 0.950 | 0.864 | 0.853 | 94             | 48   | 11   | 7    | 6    | 8.90E-8        | > 1.00E-4 | > 1.00E-4     |  |
| RPMI-8226                       | 0.958     | 2.876 | 2.830                                 | 2.060 | 1.591 | 0.818 | 0.930 | 98             | 57   | 33   | -15  | -3   | 2.02E-7        | 4.92E-6   | > 1.00E-4     |  |
| SR                              | 0.525     | 1.864 | 1.754                                 | 0.966 | 0.758 | 0.606 | 0.610 | 92             | 33   | 17   | 6    | 6    | 5.12E-8        | > 1.00E-4 | > 1.00E-4     |  |
| Non-Small Cell Lung Cancer      |           |       |                                       |       |       |       |       |                |      |      |      |      |                |           |               |  |
| A549/ATCC                       | 0.394     | 1.589 | 1.589                                 | 1.114 | 0.672 | 0.591 | 0.554 | 100            | 60   | 23   | 16   | 13   | 1.89E-7        | > 1.00E-4 | > 1.00E-4     |  |
| EKVX                            | 0.601     | 1.832 | 1.804                                 | 1.393 | 1.217 | 1.094 | 1.048 | 98             | 64   | 50   | 40   | 36   | 1.01E-6        | > 1.00E-4 | > 1.00E-4     |  |
| HOP-62                          | 0.716     | 1.553 | 1.534                                 | 1.089 | 1.003 | 0.895 | 0.780 | 98             | 45   | 34   | 21   | 8    | 7.89E-8        | > 1.00E-4 | > 1.00E-4     |  |
| HOP-92                          | 1.270     | 1.828 | 1.841                                 | 1.635 | 1.163 | 0.947 | 0.989 | 102            | 65   | -8   | -25  | -22  | 1.62E-7        | 7.68E-7   | > 1.00E-4     |  |
| NCI-H226                        | 1.017     | 1.836 | 1.773                                 | 1.596 | 1.462 | 1.271 | 1.268 | 92             | 71   | 54   | 31   | 31   | 1.52E-6        | > 1.00E-4 | > 1.00E-4     |  |
| NCI-H23                         | 0.524     | 1.714 | 1.538                                 | 0.887 | 0.893 | 0.862 | 0.846 | 85             | 31   | 31   | 28   | 27   | 4.40E-8        | > 1.00E-4 | > 1.00E-4     |  |
| NCI-H322M                       | 0.885     | 2.134 | 1.951                                 | 1.538 | 1.514 | 1.291 | 1.429 | 85             | 52   | 50   | 32   | 44   | 1.04E-6        | > 1.00E-4 | > 1.00E-4     |  |
| NCI-H460                        | 0.306     | 2.723 | 2.794                                 | 1.337 | 0.688 | 0.643 | 0.569 | 103            | 43   | 16   | 14   | 11   | 7.55E-8        | > 1.00E-4 | > 1.00E-4     |  |
| NCI-H522                        | 0.925     | 1.998 | 1.940                                 | 1.523 | 1.298 | 1.148 | 1.116 | 95             | 56   | 35   | 21   | 18   | 1.87E-7        | > 1.00E-4 | > 1.00E-4     |  |
| Colon Cancer                    |           |       |                                       |       |       |       |       |                |      |      |      |      |                |           |               |  |
| COLO 205                        | 0.469     | 1.611 | 1.624                                 | 0.811 | 0.457 | 0.375 | 0.405 | 101            | 30   | -3   | -20  | -14  | 5.22E-8        | 8.28E-7   | > 1.00E-4     |  |
| HCC-2998                        | 0.837     | 2.902 | 2.629                                 | 1.785 | 1.144 | 0.997 | 1.141 | 87             | 46   | 15   | 8    | 15   | 7.94E-8        | > 1.00E-4 | > 1.00E-4     |  |
| HCT-116                         | 0.561     | 3.003 | 2.854                                 | 1.426 | 1.009 | 0.708 | 0.958 | 94             | 35   | 18   | 6    | 16   | 5.63E-8        | > 1.00E-4 | > 1.00E-4     |  |
| HCT-15                          | 0.384     | 2.295 | 2.185                                 | 1.396 | 0.803 | 0.674 | 0.655 | 94             | 53   | 22   | 15   | 14   | 1.24E-7        | > 1.00E-4 | > 1.00E-4     |  |
| HT29                            | 0.313     | 1.678 | 1.388                                 | 0.441 | 0.372 | 0.356 | 0.329 | 79             | 9    | 4    | 3    | 1    | 2.60E-8        | > 1.00E-4 | > 1.00E-4     |  |
| KM12                            | 0.500     | 2.756 | 2.584                                 | 1.354 | 0.640 | 0.616 | 0.594 | 92             | 38   | 6    | 5    | 4    | 5.99E-8        | > 1.00E-4 | > 1.00E-4     |  |
| SW-620                          | 0.291     | 1.818 | 1.811                                 | 0.806 | 0.613 | 0.593 | 0.526 | 100            | 34   | 21   | 20   | 15   | 5.66E-8        | > 1.00E-4 | > 1.00E-4     |  |
| CNS Cancer                      |           |       |                                       |       |       |       |       |                |      |      |      |      |                |           |               |  |
| SF-268                          | 0.578     | 1.959 | 1.927                                 | 1.614 | 1.222 | 1.040 | 0.875 | 98             | 75   | 47   | 33   | 21   | 7.61E-7        | > 1.00E-4 | > 1.00E-4     |  |
| SF-295                          | 0.996     | 2.748 | 2.682                                 | 2.485 | 1.317 | 0.600 | 0.738 | 96             | 85   | 18   | -40  | -26  | 3.35E-7        | 2.06E-6   | > 1.00E-4     |  |
| SF-539                          | 1.027     | 2.919 | 2.944                                 | 2.603 | 1.817 | 1.425 | 1.489 | 101            | 83   | 42   | 21   | 24   | 6.34E-7        | > 1.00E-4 | > 1.00E-4     |  |
| SNB-19                          | 0.423     | 1.698 | 1.711                                 | 1.342 | 0.973 | 0.753 | 0.766 | 101            | 72   | 43   | 26   | 27   | 5.77E-7        | > 1.00E-4 | > 1.00E-4     |  |
| SNB-75                          | 0.868     | 1.716 | 1.681                                 | 1.693 | 1.387 | 1.005 | 0.801 | 96             | 97   | 61   | 16   | -8   | 1.77E-6        | 4.74E-5   | > 1.00E-4     |  |
| U251                            | 0.434     | 1.818 | 2.071                                 | 1.635 | 0.944 | 0.668 | 0.613 | 118            | 87   | 37   | 17   | 13   | 5.45E-7        | > 1.00E-4 | > 1.00E-4     |  |
| Melanoma                        |           |       |                                       |       |       |       |       |                |      |      |      |      |                |           |               |  |
| LOX IMVI                        | 0.380     | 2.440 | 2.343                                 | 1.359 | 0.397 | 0.299 | 0.330 | 95             | 48   | 1    | -21  | -13  | 8.88E-8        | 1.09E-6   | > 1.00E-4     |  |
| MALME-3M                        | 0.623     | 1.099 | 1.161                                 | 0.871 | 0.628 | 0.593 | 0.597 | 113            | 52   | 1    | -5   | -4   | 1.10E-7        | 1.45E-6   | > 1.00E-4     |  |
| M14                             | 0.574     | 2.167 | 2.084                                 | 1.111 | 0.993 | 0.554 | 0.763 | 95             | 34   | 26   | -4   | 12   | 5.41E-8        | .         | > 1.00E-4     |  |
| MDA-MB-435                      | 0.465     | 2.334 | 2.355                                 | 1.232 | 0.910 | 0.678 | 0.674 | 101            | 41   | 24   | 11   | 11   | 7.09E-8        | > 1.00E-4 | > 1.00E-4     |  |
| SK-MEL-2                        | 0.978     | 1.975 | 1.969                                 | 1.635 | 1.326 | 1.228 | 1.179 | 99             | 66   | 35   | 25   | 20   | 3.26E-7        | > 1.00E-4 | > 1.00E-4     |  |
| SK-MEL-28                       | 0.742     | 2.170 | 2.138                                 | 1.577 | 1.158 | 0.963 | 1.083 | 98             | 58   | 29   | 15   | 24   | 1.95E-7        | > 1.00E-4 | > 1.00E-4     |  |
| SK-MEL-5                        | 0.770     | 2.790 | 2.729                                 | 2.104 | 1.241 | 0.508 | 0.943 | 97             | 66   | 23   | -34  | 9    | 2.37E-7        | .         | > 1.00E-4     |  |
| UACC-257                        | 1.062     | 2.047 | 2.080                                 | 1.886 | 1.274 | 1.289 | 1.298 | 103            | 84   | 22   | 23   | 24   | 3.48E-7        | > 1.00E-4 | > 1.00E-4     |  |
| UACC-62                         | 0.761     | 2.872 | 2.726                                 | 1.822 | 1.006 | 0.726 | 0.881 | 93             | 50   | 12   | -5   | 6    | 1.01E-7        | .         | > 1.00E-4     |  |
| Ovarian Cancer                  |           |       |                                       |       |       |       |       |                |      |      |      |      |                |           |               |  |
| IGROV1                          | 0.585     | 1.949 | 1.940                                 | 1.247 | 0.845 | 0.854 | 0.785 | 99             | 49   | 19   | 20   | 15   | 9.35E-8        | > 1.00E-4 | > 1.00E-4     |  |
| OVCAR-3                         | 0.533     | 1.878 | 1.915                                 | 1.647 | 0.908 | 0.675 | 0.675 | 103            | 83   | 28   | 11   | 11   | 3.96E-7        | > 1.00E-4 | > 1.00E-4     |  |
| OVCAR-4                         | 0.776     | 1.596 | 1.617                                 | 1.535 | 1.345 | 1.246 | 1.202 | 103            | 93   | 69   | 57   | 52   | > 1.00E-4      | > 1.00E-4 | > 1.00E-4     |  |
| OVCAR-5                         | 0.742     | 1.941 | 1.808                                 | 1.688 | 1.276 | 1.129 | 1.104 | 89             | 79   | 44   | 32   | 30   | 6.91E-7        | > 1.00E-4 | > 1.00E-4     |  |
| OVCAR-8                         | 0.509     | 2.011 | 2.081                                 | 1.862 | 1.029 | 0.866 | 0.825 | 105            | 90   | 35   | 24   | 21   | 5.27E-7        | > 1.00E-4 | > 1.00E-4     |  |
| NCI/ADR-RES                     | 0.502     | 1.786 | 1.748                                 | 1.729 | 1.031 | 0.745 | 0.754 | 97             | 96   | 41   | 19   | 20   | 6.89E-7        | > 1.00E-4 | > 1.00E-4     |  |
| SK-OV-3                         | 0.912     | 2.098 | 2.023                                 | 1.556 | 1.006 | 1.008 | 0.957 | 94             | 54   | 8    | 8    | 4    | 1.24E-7        | > 1.00E-4 | > 1.00E-4     |  |
| Renal Cancer                    |           |       |                                       |       |       |       |       |                |      |      |      |      |                |           |               |  |
| 786-0                           | 0.656     | 2.224 | 2.151                                 | 1.716 | 1.338 | 0.772 | 0.876 | 95             | 68   | 44   | 7    | 14   | 5.38E-7        | > 1.00E-4 | > 1.00E-4     |  |
| A498                            | 1.368     | 2.011 | 2.083                                 | 1.846 | 1.586 | 1.451 | 1.484 | 111            | 74   | 34   | 13   | 18   | 3.98E-7        | > 1.00E-4 | > 1.00E-4     |  |
| ACHN                            | 0.446     | 2.030 | 2.005                                 | 1.105 | 0.848 | 0.702 | 0.750 | 98             | 42   | 25   | 16   | 19   | 7.12E-8        | > 1.00E-4 | > 1.00E-4     |  |
| RXF 393                         | 0.773     | 1.581 | 1.571                                 | 1.157 | 1.027 | 0.466 | 0.556 | 99             | 47   | 31   | -40  | -28  | 8.92E-8        | 2.76E-6   | > 1.00E-4     |  |
| SN12C                           | 0.516     | 2.191 | 1.976                                 | 1.233 | 1.107 | 1.035 | 0.992 | 87             | 43   | 35   | 31   | 28   | 6.89E-8        | > 1.00E-4 | > 1.00E-4     |  |
| TK-10                           | 1.079     | 2.167 | 2.126                                 | 1.617 | 1.376 | 1.384 | 1.309 | 96             | 49   | 27   | 28   | 21   | 9.71E-8        | > 1.00E-4 | > 1.00E-4     |  |
| UO-31                           | 0.629     | 1.667 | 1.508                                 | 1.140 | 0.858 | 0.715 | 0.777 | 85             | 49   | 22   | 8    | 14   | 9.51E-8        | > 1.00E-4 | > 1.00E-4     |  |
| Prostate Cancer                 |           |       |                                       |       |       |       |       |                |      |      |      |      |                |           |               |  |
| PC-3                            | 0.617     | 1.674 | 1.545                                 | 1.217 | 1.116 | 0.931 | 0.884 | 88             | 57   | 47   | 30   | 25   | 5.09E-7        | > 1.00E-4 | > 1.00E-4     |  |
| DU-145                          | 0.388     | 1.648 | 1.558                                 | 0.757 | 0.811 | 0.473 | 0.449 | 93             | 29   | 34   | 7    | 5    | 4.72E-8        | > 1.00E-4 | > 1.00E-4     |  |
| Breast Cancer                   |           |       |                                       |       |       |       |       |                |      |      |      |      |                |           |               |  |
| MCF7                            | 0.444     | 2.102 | 1.873                                 | 1.005 | 0.898 | 0.766 | 0.671 | 86             | 34   | 27   | 19   | 14   | 4.91E-8        | > 1.00E-4 | > 1.00E-4     |  |
| MDA-MB-231/ATCC                 | 0.547     | 1.393 | 1.473                                 | 1.063 | 0.732 | 0.500 | 0.531 | 109            | 61   | 22   | -9   | -3   | 1.90E-7        | 5.22E-6   | > 1.00E-4     |  |
| HS 578T                         | 1.100     | 2.097 | 2.181                                 | 1.892 | 1.610 | 1.345 | 1.381 | 108            | 79   | 51   | 25   | 28   | 1.11E-6        | > 1.00E-4 | > 1.00E-4     |  |
| BT-549                          | 1.182     | 2.414 | 2.399                                 | 1.746 | 1.775 | 0.999 | 1.399 | 99             | 46   | 48   | -15  | 18   | 8.32E-8        | .         | > 1.00E-4     |  |
| T-47D                           | 0.873     | 1.590 | 1.514                                 | 1.190 | 1.023 | 1.005 | 1.024 | 89             | 44   | 21   | 18   | 21   | 7.45E-8        | > 1.00E-4 | > 1.00E-4     |  |
| MDA-MB-468                      | 0.706     | 1.406 | 1.372                                 | 0.895 | 0.697 | 0.719 | 0.693 | 95             | 27   | -1   | 2    | -2   | 4.59E-8        | .         | > 1.00E-4     |  |

**Figure S4:** NCI-60 Cell screening results with GI50 values of a pan-inhibitor of Hsp90, **17-AAG** (five-dose experiment) **Source:** NCI DTP

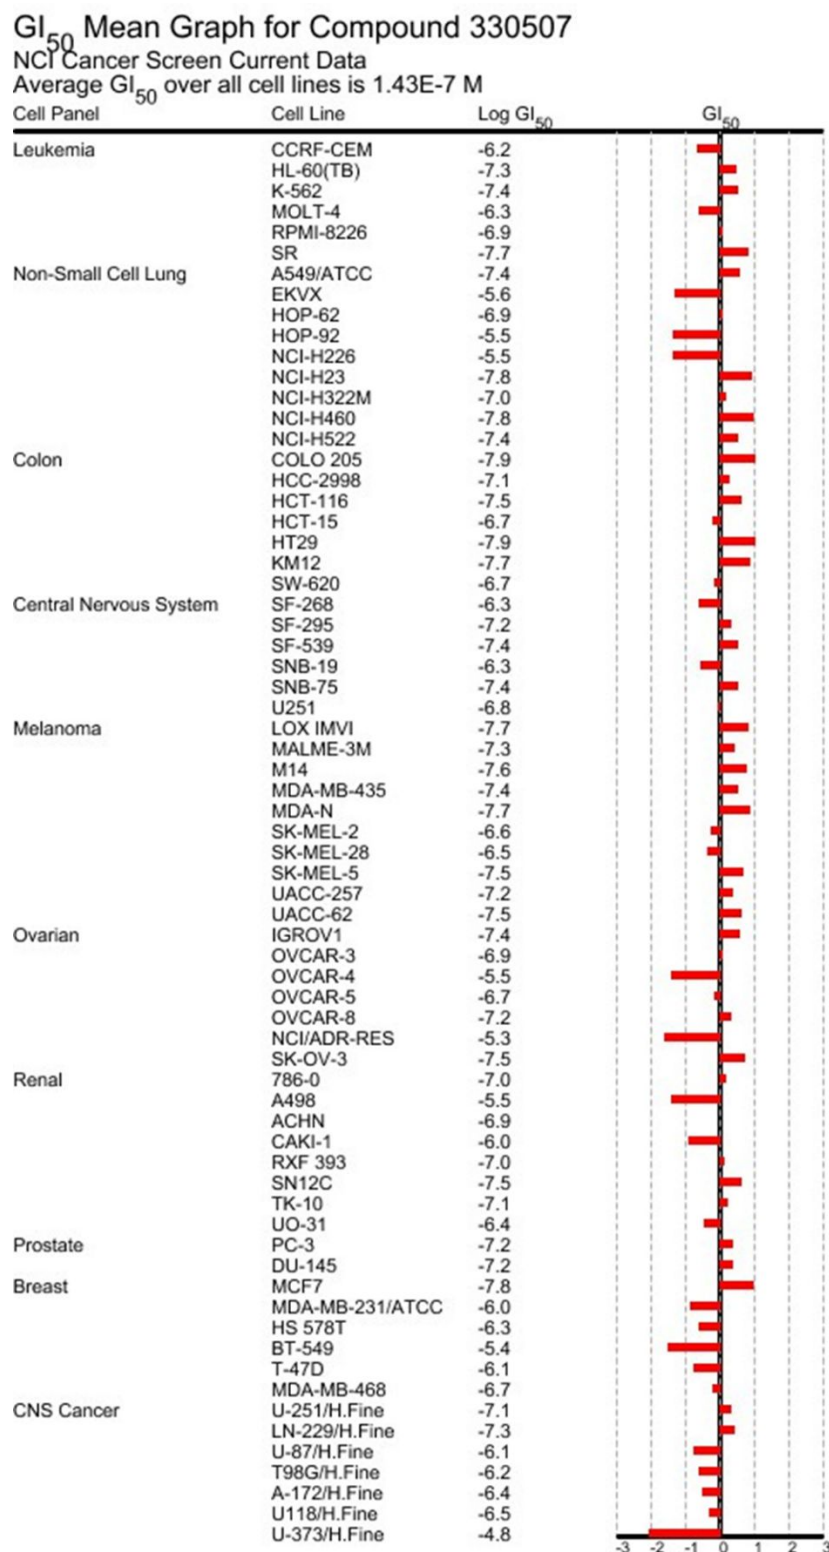



**Figure S5:** NCI-60 Cell screening results with **6a** (10  $\mu$ M)

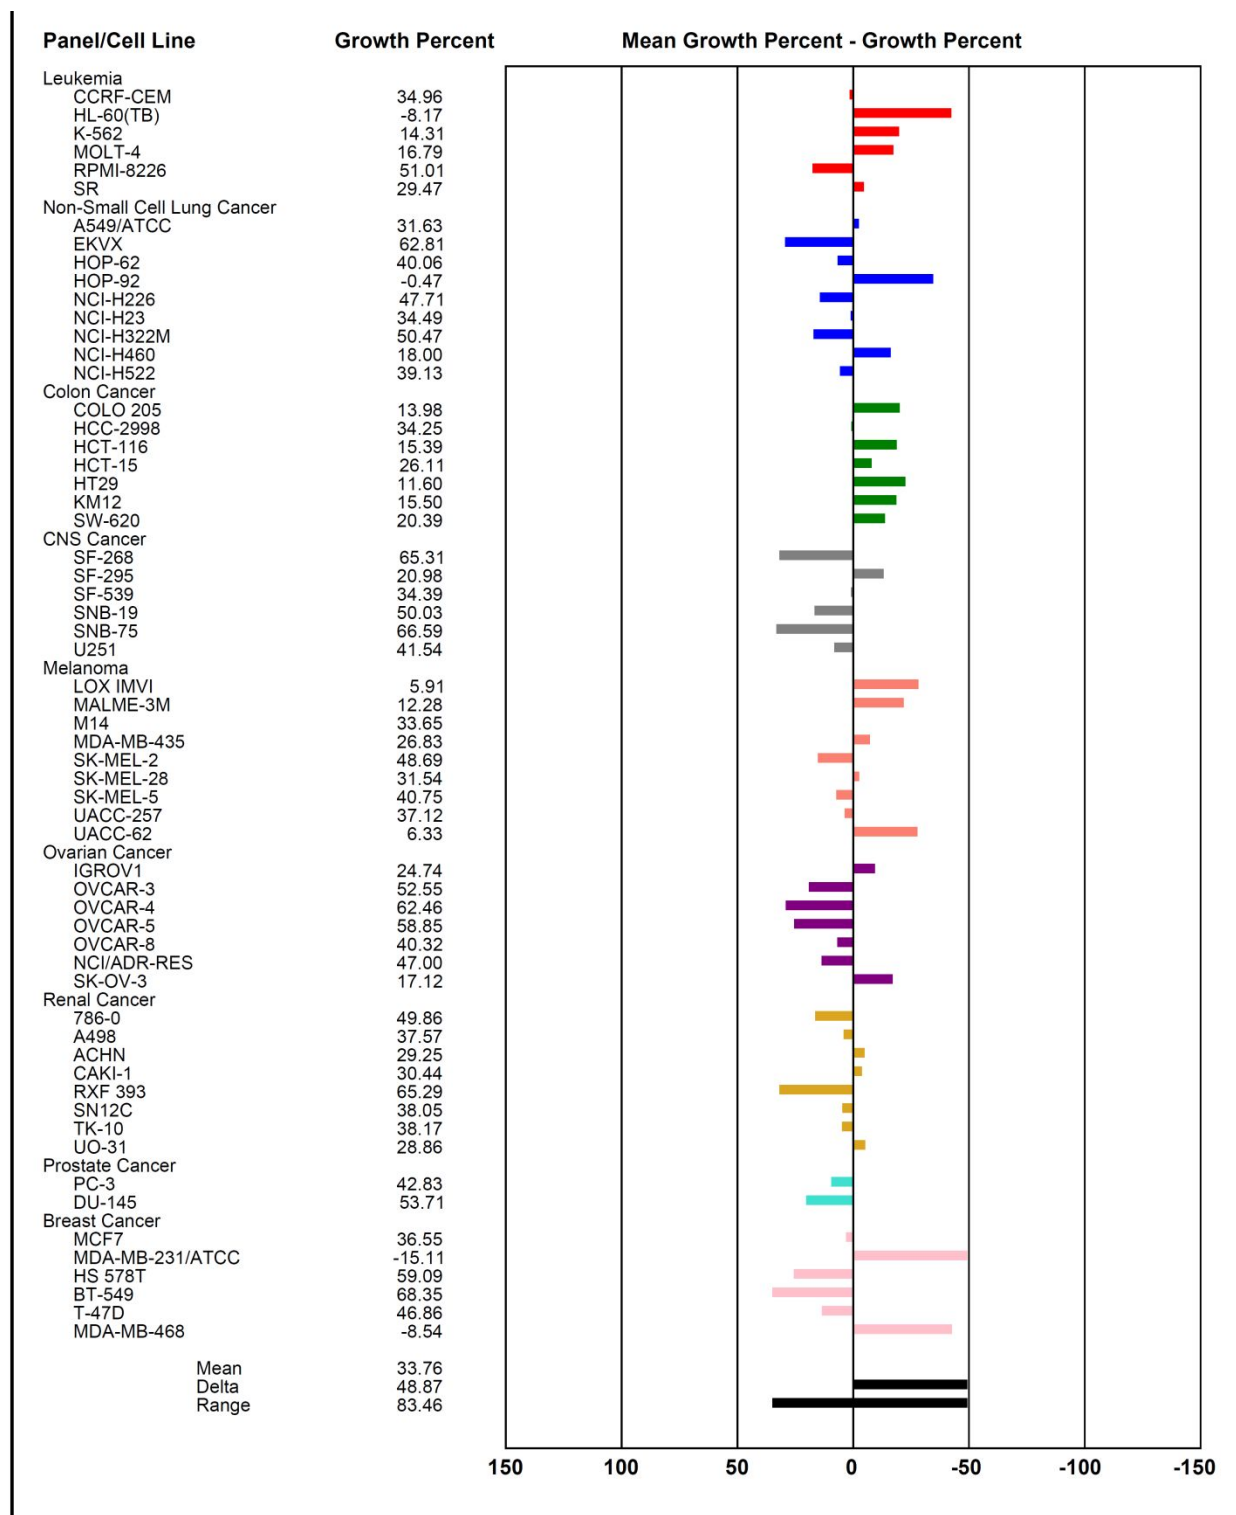

**Table S1:** IC<sub>50</sub> of **4d**, **5b** and **6a** for Grp94 and Trap1.

| Compound  | Grp94 IC50 (μM) | Trap1 IC50 (μM) |
|-----------|-----------------|-----------------|
| <b>4d</b> | >50             | >50             |
| <b>5b</b> | >50             | 50              |
| <b>6a</b> | >50             | >50             |

**Table S2:** GI50 values against Hct116 and Hek293 cells

| Compound     | Hct116 GI50 (μM) | Hek293 GI50 (μM) |
|--------------|------------------|------------------|
| <b>4d</b>    | 0.056            | 0.587± 0.02      |
| <b>5b</b>    | >5               | 2.338± 0.33      |
| <b>6a</b>    | 0.427            | 0.943± 0.07      |
| Geldanamycin | 0.0158           | 0.0246           |
